# Supplementary material for: Independent evolution of oleate hydratase clades in Bacillales reflects molecular convergence
Source: Front Mol Biosci. 2024 Dec 12;11:1485485. doi: 10.3389/fmolb.2024.1485485 (PMC11669549; doi:10.3389/fmolb.2024.1485485)
Supplement: Supplementary file 1 [file Table2.xlsx]

## Sheet: Table S2
Table S2. Listeria monocytogenes OhyA tBLASTn hits
Scientific Name	Max Score	Total Score	Query Cover	E value	Per. Ident	Acc. Len	Accession
Listeria monocytogenes EGD-e	1156	1156	1	0	0.9753	2944528	NC_003210.1
Listeria cossartiae subsp. cossartiae	1154	1154	1	0	0.9735	1009678	NZ_JAARYM010000001.1
Listeria farberi	1152	1152	1	0	0.9717	1483358	NZ_JAARZL010000001.1
Listeria swaminathanii	1148	1148	1	0	0.9682	2848613	NZ_CP156021.1
Listeria innocua	1147	1147	1	0	0.9664	2782573	NZ_CP117229.1
Listeria marthii	1145	1145	1	0	0.9664	255478	NZ_JAASWB010000005.1
Listeria welshimeri	1144	1144	1	0	0.9647	2814137	NZ_LT906444.1
Listeria ivanovii subsp. ivanovii	1122	1122	1	0	0.9417	2919548	NZ_CP009577.1
Listeria seeligeri serovar 1/2b str. SLCC3954	1112	1112	1	0	0.9329	2797636	NC_013891.1
Bacillus massiliigorillae	989	989	0.99	0	0.8206	3535993	NZ_HG428741.1
Bacillus massilioanorexius	972	972	0.95	0	0.8373	107849	NZ_CABKRX010000057.1
Sporolactobacillus pectinivorans	935	935	0.94	0	0.809	3890159	NZ_NXGA01000001.1
Listeria costaricensis	933	933	0.99	0	0.7709	12740	NZ_FXUT01000030.1
Paenibacillus segetis	781	781	0.91	0	0.7029	695480	NZ_BMFT01000002.1
Paenibacillus anaericanus	777	777	0.91	0	0.6971	68015	NZ_RZNY01000023.1
Paenibacillus selenitireducens	776	776	0.92	0	0.6939	524260	NZ_MSZX01000004.1
Paenibacillus albiflavus	776	776	0.92	0	0.6882	620505	NZ_SKFG01000001.1
Paenibacillus uliginis N3/975	775	775	0.92	0	0.6882	6452185	NZ_LT840184.1
Paenibacillus guangzhouensis	772	772	0.92	0	0.6863	6903680	NZ_CP045293.1
Paenibacillus terrigena DSM 21567	769	769	0.92	0	0.6825	389347	NZ_KB895418.1
Salipaludibacillus agaradhaerens	766	766	0.93	0	0.6848	4319439	NZ_KV917378.1
Paenibacillus turicensis	759	759	0.91	0	0.6743	113781	NZ_JAGGKG010000018.1
Gorillibacterium timonense	755	755	0.91	0	0.6832	1130530	NZ_LN881723.1
Paenibacillus glacialis	751	751	0.92	0	0.6882	192776	NZ_LVJH01000022.1
Paenibacillus macquariensis	746	746	0.92	0	0.6806	216890	NZ_FTNK01000010.1
Paenibacillus faecis	637	637	0.91	0	0.5912	876944	NZ_VSDO01000004.1
Paenibacillus woosongensis	631	631	0.91	0	0.5893	5289572	NZ_CP126084.1
Paenibacillus durus	629	629	0.94	0	0.577	6038347	NZ_CP009288.1
Paenibacillus bouchesdurhonensis	627	627	0.91	0	0.5854	4816051	NZ_LT732548.1
Paenibacillus rubinfantis	626	626	0.91	0	0.5788	701415	NZ_LN909064.1
Paenibacillus oralis	625	1065	0.93	0	0.5682	7574443	NZ_RRCN01000001.1
Paenibacillus tuaregi	624	624	0.92	0	0.5859	5631190	NZ_LT575476.1
Paenibacillus typhae	623	623	0.92	0	0.5787	61558	NZ_FNDX01000037.1
Paenibacillus sophorae	622	622	0.92	0	0.584	5867720	NZ_CP076607.1
Fontibacillus phaseoli	622	622	0.91	0	0.5862	248918	NZ_QPJW01000007.1
Paenibacillus rhizophilus	622	622	0.91	0	0.5862	332757	NZ_RQPI01000004.1
Paenibacillus barengoltzii G22	621	621	0.91	0	0.5712	687047	NZ_KE159654.1
Paenibacillus auburnensis	621	621	0.92	0	0.5821	264584	NZ_CAKMMG010000008.1
Paenibacillus etheri	621	621	0.93	0	0.576	134693	NZ_LCZJ02000028.1
Paenibacillus odorifer	621	621	0.93	0	0.5722	6812473	NZ_CP009428.1
Paenibacillus mellifer	621	621	0.91	0	0.5701	242765	NZ_JALPRK010000006.1
Paenibacillus senegalimassiliensis	620	620	0.92	0	0.563	369708	NZ_LN909042.1
Paenibacillus lentus	620	620	0.91	0	0.5816	5288676	NZ_CP034248.1
Paenibacillus jilunlii	620	620	0.92	0	0.584	7105405	NZ_CP048429.1
Paenibacillus zanthoxyli JH29	620	620	0.92	0	0.584	34478	NZ_ASSD01000031.1
Paenibacillus graminis	619	619	0.92	0	0.5821	7166464	NZ_CP009287.1
Paenibacillus pedocola	619	619	0.92	0	0.5782	6472393	NZ_CP134223.1
Paenibacillus fonticola DSM 21315	619	619	0.91	0	0.5758	238492	NZ_KB907250.1
Paenibacillus rhizolycopersici	618	618	0.91	0	0.572	374065	NZ_JADCNN020000002.1
Paenibacillus phocaensis	618	618	0.91	0	0.5662	143920	NZ_FCOQ01000007.1
Paenibacillus riograndensis SBR5	617	617	0.92	0	0.5802	7919576	NZ_LN831776.1
Paenibacillus timonensis	617	617	0.91	0	0.5758	125284	NZ_JAKSXN010000006.1
Paenibacillus sabinae T27	617	617	0.92	0	0.5821	5270569	NZ_CP004078.1
Paenibacillus albidus	617	617	0.92	0	0.5803	229714	NZ_BMKR01000010.1
Paenibacillus tundrae	616	616	0.92	0	0.5763	6534616	NZ_CP145605.1
Fontibacillus panacisegetis	616	616	0.91	0	0.5832	512456	NZ_FNBG01000001.1
Paenibacillus sonchi	616	616	0.92	0	0.5763	256778	NZ_JAIFKC010000018.1
Paenibacillus pseudetheri	616	616	0.93	0	0.5741	117484	NZ_CAKMAB010000017.1
Paenibacillus apii	616	616	0.92	0	0.5782	422628	NZ_JAAKGU010000003.1
Paenibacillus silagei	615	615	0.92	0	0.5744	37857	NZ_JAGGLV010000041.1
Paenibacillus tianjinensis	615	615	0.92	0	0.5744	6273877	NZ_CP070969.1
Fontibacillus solani	615	615	0.93	0	0.5832	23620	NZ_JACJIP010000053.1
Paenibacillus tritici	614	1047	0.93	0	0.5744	7708938	NZ_CP073365.1
Paenibacillus polysaccharolyticus	614	614	0.92	0	0.5803	309587	NZ_FMVM01000007.1
Paenibacillus sinensis	613	613	0.91	0	0.5739	289462	NZ_JAHCMB010000121.1
Paenibacillus camerounensis	611	611	0.95	0	0.5543	92821	NZ_CCDG010000037.1
Paenibacillus stellifer	611	611	0.91	0	0.5739	5658798	NZ_CP009286.1
Paenibacillus wynnii	610	610	0.94	0	0.5595	2789729	NZ_JQCR01000002.1
Paenibacillus barcinonensis	610	610	0.91	0	0.5835	6393895	NZ_CP054614.1
Paenibacillus borealis	610	1046	0.93	0	0.5687	8156808	NZ_CP009285.1
Paenibacillus donghaensis	610	610	0.91	0	0.5785	8542333	NZ_CP021780.1
Paenibacillus silvae	609	609	0.92	0	0.5747	328952	NZ_BMFU01000005.1
Paenibacillus amylolyticus	609	609	0.92	0	0.5709	6917693	NZ_CP145892.1
Paenibacillus phytohabitans	608	608	0.92	0	0.5649	93078	NZ_WHOB01000035.1
Paenibacillus xylanexedens	607	607	0.92	0	0.5709	7053622	NZ_CP018620.1
Paenibacillus monticola	602	602	0.93	0	0.5666	1092698	NZ_WJXB01000001.1
Paenibacillus agri	601	601	0.93	0	0.5714	47810	NZ_JABWCS010000183.1
Paenibacillus helianthi	598	598	0.92	0	0.5725	61896	NZ_LVWI01000055.1
Paenibacillus thiaminolyticus	598	598	0.93	0	0.5695	6612542	NZ_CP041405.1
Paenibacillus tengchongensis	595	595	0.92	0	0.5744	701281	NZ_WACP01000001.1
Paenibacillus profundus	591	591	0.93	0	0.5629	49816	NZ_JAJNBZ010000040.1
Paenibacillus pini JCM 16418	554	554	0.92	2e-174	0.5217	220114	NZ_BAVZ01000008.1
Paenibacillus ihuae	364	626	0.92	2e-170	0.5908	4295883	NZ_LN831198.1
Paenibacillus phoenicis	510	626	0.9	2e-170	0.5758	4587505	NZ_JAYERP010000001.1
Paenibacillus dokdonensis	535	535	0.91	1e-167	0.5105	886769	NZ_STGQ01000003.1
Paenibacillus shirakamiensis	532	532	0.91	8e-167	0.5057	1535308	NZ_JAGGLD010000001.1
Paenibacillus turicensis	447	447	0.9	2e-137	0.4502	145629	NZ_JAGGKG010000011.1
Paenibacillus helianthi	445	445	0.9	1e-136	0.4406	327223	NZ_LVWI01000037.1
Paenibacillus monticola	444	444	0.9	4e-136	0.4425	809965	NZ_WJXB01000003.1
Paenibacillus agri	442	442	0.9	1e-135	0.4368	314579	NZ_JABWCS010000218.1
Paenibacillus phocaensis	442	442	0.93	2e-135	0.4403	202288	NZ_FCOQ01000038.1
Paenibacillus silagei	439	439	0.93	2e-134	0.4307	479319	NZ_JAGGLV010000002.1
Paenibacillus piscarius	435	435	0.93	4e-133	0.4251	581999	NZ_JAIEUI010000002.1
Paenibacillus phytohabitans	434	434	0.93	7e-133	0.4232	436203	NZ_WHOB01000020.1
Bacillus marinisedimentorum	422	422	0.92	1e-128	0.412	147130	NZ_LWBL02000041.1
Paenibacillus brevis	397	397	0.91	5e-120	0.4157	409961	NZ_JAHLQJ010000002.1
Paenibacillus antibioticophila	396	396	0.91	1e-119	0.4157	740332	NZ_HG005141.1
Lysinibacillus pakistanensis	394	394	0.91	1e-118	0.4087	5249694	NZ_CP126101.1
Paenibacillus lutimineralis	392	392	0.91	4e-118	0.4162	6497679	NZ_CP034346.1
Lysinibacillus xylanilyticus	391	391	0.91	5e-118	0.4087	490472	NZ_LFXJ01000002.1
Viridibacillus soli	391	391	0.91	7e-118	0.4068	80315	NZ_JAEOAH010000009.1
Lysinibacillus pinottii	390	390	0.91	1e-117	0.4087	177123	NZ_JANTOO010000001.1
Lysinibacillus irui	390	390	0.91	2e-117	0.4068	4447526	NZ_CP113527.1
Lysinibacillus fusiformis	390	390	0.91	2e-117	0.4094	4843789	NZ_CP010820.1
Lysinibacillus agricola	389	389	0.91	3e-117	0.4087	5285903	NZ_CP067341.1
Paenibacillus motobuensis	389	389	0.91	3e-117	0.4124	310647	NZ_BAAACX010000006.1
Paenibacillus apiarius	388	803	0.91	6e-117	0.4075	5969911	NZ_JAFFHZ010000001.1
Lysinibacillus capsici	388	388	0.91	7e-117	0.4087	4691642	NZ_CP084108.1
Lysinibacillus boronitolerans JCM 21713 = 10a = NBRC 103108	388	388	0.91	9e-117	0.4083	401825	NZ_AVCW01000001.1
Oikeobacillus pervagus	387	387	0.91	1e-116	0.4011	30104	NZ_JAUSUC010000037.1
Paenibacillus timonensis	340	446	0.93	4e-116	0.4174	43767	NZ_JAKSXN010000048.1
Paenibacillus aquistagni	386	386	0.91	5e-116	0.4038	267337	NZ_FXAZ01000008.1
Paenibacillus taiwanensis DSM 18679	383	383	0.91	5e-115	0.4026	124074	NZ_AULE01000001.1
Lysinibacillus parviboronicapiens	382	382	0.91	1e-114	0.3955	4822805	NZ_CP073713.1
Paenibacillus alvei	382	382	0.91	1e-114	0.4038	135928	NZ_JAMDNA010000045.1
Paenibacillus alvei	382	382	0.91	1e-114	0.4038	1282530	NZ_JAOQAR020000002.1
Amphibacillus jilinensis Y1	377	377	0.9	3e-113	0.4113	1374356	NZ_JH976434.1
Amphibacillus cookii	377	377	0.91	3e-113	0.4105	340972	NZ_JAFBDS010000003.1
Gemella sanguinis	375	375	0.91	2e-112	0.3875	1796606	NZ_CP046313.1
Paenibacillus aceti	374	374	0.91	4e-112	0.4113	5572757	NZ_KZ987724.1
Staphylococcus hyicus	367	367	0.9	1e-109	0.4038	2472129	NZ_CP008747.1
Paenibacillus azoreducens	367	367	0.91	1e-109	0.4019	7316152	NZ_AP025343.1
Staphylococcus agnetis	367	367	0.9	2e-109	0.4019	2449249	NZ_CP045927.1
Kurthia sibirica	366	366	0.9	3e-109	0.3883	42797	NZ_BJUF01000025.1
Staphylococcus hominis	360	360	0.91	4e-107	0.3861	2220494	NZ_CP033732.1
Paenibacillus piscarius	356	614	0.92	9e-106	0.5506	121810	NZ_JAIEUI010000023.1
Gemella morbillorum	355	355	0.91	1e-105	0.3894	1760930	NZ_LS483440.1
Staphylococcus nepalensis	352	352	0.9	3e-104	0.3848	40183	NZ_CP017467.1
Staphylococcus aureus subsp. aureus NCTC 8325	350	350	0.9	7e-104	0.3886	2821361	NC_007795.1
Staphylococcus durrellii	350	350	0.9	8e-104	0.3829	2542724	NZ_JADIIO010000001.1
Staphylococcus chromogenes	349	349	0.87	2e-103	0.3937	2351540	NZ_CP031274.1
Kurthia gibsonii	349	349	0.9	2e-103	0.392	43700	NZ_BJOB01000021.1
Staphylococcus schweitzeri	348	348	0.9	4e-103	0.3859	2784939	NZ_LR134304.1
Saccharibacillus qingshengii	347	347	0.93	9e-103	0.3812	218563	NZ_JAAZWC010000006.1
Saccharibacillus deserti	346	346	0.91	2e-102	0.3849	301312	NZ_JABJVN010000007.1
Staphylococcus coagulans	346	346	0.9	3e-102	0.3878	2483061	NZ_CP092966.1
Staphylococcus argenteus	345	345	0.9	4e-102	0.3821	2762785	NC_016941.1
Staphylococcus petrasii	344	344	0.9	1e-101	0.3829	2488690	NZ_UHDU01000001.1
Staphylococcus pragensis	343	343	0.9	2e-101	0.3829	40624	NZ_SRPJ01000011.1
Staphylococcus haemolyticus	343	343	0.9	2e-101	0.3771	2517618	NZ_CP035291.1
Staphylococcus schleiferi	343	343	0.9	2e-101	0.3859	2520325	NZ_CP094712.1
Saccharibacillus alkalitolerans	341	341	0.91	1e-100	0.3872	294023	NZ_JAAFGS010000005.1
Staphylococcus borealis	340	340	0.9	2e-100	0.3745	242500	NZ_CUEE01000005.1
Staphylococcus epidermidis	338	338	0.9	9e-100	0.389	2466502	NZ_CP035288.1
Paenibacillus bovis	338	338	0.9	2e-99	0.389	5354277	NZ_CP013023.1
Staphylococcus croceilyticus	338	338	0.9	2e-99	0.3829	391912	NZ_SRJF01000001.1
Staphylococcus lugdunensis	332	332	0.9	2e-97	0.3676	2571829	NZ_CP014022.1
Listeria grayi	331	331	0.9	3e-97	0.3887	2751104	NZ_LR134483.1
Macrococcoides caseolyticum	330	330	0.91	6e-97	0.3611	2108682	NZ_CP065729.1
Gemella bergeri ATCC 700627	322	322	0.89	5e-94	0.3669	8723	NZ_KI271849.1
Gemella massiliensis	208	358	0.89	6e-90	0.3866	714389	NZ_LT635546.1
Sporosarcina koreensis	162	162	0.47	2e-43	0.3577	828	NZ_LQYA01000035.1
Paenibacillus chitinolyticus	63.5	63.5	0.13	6e-08	0.4684	6509090	NZ_CP026520.1
Alkalihalophilus lindianensis	55.5	55.5	0.11	2e-07	0.4531	263	NZ_JAWJBA010000497.1
Paenibacillus dendritiformis	59.7	59.7	0.1	7e-07	0.4754	6547390	NZ_AP025344.1
MAX score <300
Sequence with premature stop codons
